# Supplementary material for: Brachypodium Antifreeze Protein Gene Products Inhibit Ice Recrystallisation, Attenuate Ice Nucleation, and Reduce Immune Response
Source: Plants (Basel). 2022 May 31;11(11):1475. doi: 10.3390/plants11111475 (PMC9182837; doi:10.3390/plants11111475)
Supplement: Supplementary file 1 [file plants-11-01475-s001.zip › File S2.txt]

File S2. All sequences used for modeling

------------------------
#Ice nucleating proteins
------------------------

>InaZ
MNLDKALVLRTCANNMADHCGLIWPASGTVESRYWQSTRRHENGLVGLLWGAGTSAFLSVHADARWIVCEVAVADIISLEEPGMVKFPRAEVVHVGDRISASHFISARQADPASTSTSTLTPMPTAIPTPMPAVASVTLPVAEQARHEVFDVASVSAAAAPVNTLPVTTPQNVQTATYGSTLSGDNHSRLIAGYGSNETAGNHSDLIAGYGSTGTAGSDSWLVAGYGSTQTAGGDSALTAGYGSTQTAREGSNLTAGYGSTGTAGSDSSLIAGYGSTQTSGGDSSLTAGYGSTQTAQEGSNLTAGYGSTGTAGSDSSLIAGYGSTQTSGGDSSLTAGYGSTQTAQEGSNLTAGYGSTGTAGVDSSLIAGYGSTQTSGSDSALTAGYGSTQTAQEGSNLTAGYGSTGTAGSDSSLIAGYGSTQTSGSDSSLTAGYGSTQTAQEGSILTAGYGSTGTAGVDSSLIAGYGSTQTSGSDSALTAGYGSTQTAQEGSNLTAGYGSTGTAGADSSLIAGYGSTQTSGSESSLTAGYGSTQTAREGSTLTAGYGSTGTAGADSSLIAGYGSTQTSGSESSLTAGYGSTQTAQQGSVLTSGYGSTQTAGAASNLTTGYGSTGTAGHESFIIAGYGSTQTAGHKSILTAGYGSTQTARDGSDLIAGYGSTGTAGSGSSLIAGYGSTQTASYRSMLTAGYGSTQTAREHSDLVTGYGSTSTAGSNSSLIAGYGSTQTAGFKSILTAGYGSTQTAQERTSLVAGYGSTSTAGYSSSLIAGYGSTQTAGYESTLTAGYGSTQTAQENSSLTTGYGSTSTAGYSSSLIAGYGSTQTAGYESTLTAGYGSTQTAQERSDLVTGYGSTSTAGYASSLIAGYGSTQTAGYESTLTAGYGSTQTAQENSSLTTGYGSTSTAGFASSLISGYGSTQTAGYKSTLTAGYGSTQTAEYGSSLTAGYGSTATAGQDSSLIAGYGSSLTSGIRSFLTAGYGSTLIAGLRSVLIAGYGSSLTSGVRSTLTAGYGSNQIASYGSSLIAGHESIQVAGNKSMLIAGKGSSQTAGFRSTLIAGAGSVQLAGDRSRLIAGADSNQTAGDRSKLLAGNNSYLTAGDRSKLTGGHDCTLMAGDQSRLTAGKNSVLTAGARSKLIGSEGSTLSAGEDSILIFRLWDGKRYRQLVARTGENGVEADIPYYVNEDDDIVDKPDEDDDWIEVK

>InaK
MTLDKALVLRTCANNMADHCGLIWPASGTVESRYWQSTRRHENGLVGLLWGAGTSAFLSVHADARWIVCEVAVADIISLEEPGMVKFPRAEVVHVGDRISASHFISARQADPASTSTSTSTSTLTPMPTAIPTPMPAVASVTLPVAEQARHEVFDVASVSAAAAPVNTLPVTTPQNLQTATYGSTLSGDNHSRLIAGYGSNETAGNHSDLIAGYGSTGTAGYGSTQTSGEDSSLTAGYGSTQTAQEGSNLTAGYGSTGTAGSDSSLIAGYGSTQTSGGDSSLTAGYGSTQTAQEGSNLTAGYGSTGTAGVDSSLIAGYGSTQTSGSDSALTAGYGSTQTAQEGSNLTAGYGSTGTAGSDSSLIAGYGSTQTSGSDSSLTAGYGSTQTAQEGSNLTAGYGSTGTAGVDSSLIAGYGSTQTSGSDSALTAGYGSTQTAQEGSNLTAGYGSTGTAGADSSLIAGYGSTQTSGSESSLTAGYGSTQTAREGSTLTAGYGSTGTAGADSSLIAGYGSTQTSGSESSLTAGYGSTQTAQQGSVLTSGYGSTQTAGAASNLTTGYGSTGTAGHESFIIAGYGSTQTAGHKSILTAGYGSTQTARDGSYLIAGYGSTGTAGSGSSLIAGYGSTQTASYRSMLTAGYGSTQTAREHSDLVTGYGSTSTAGSNSSLIAGYGSTQTAGFKSILTAGYGSTQTAQERSDLVAGYGSTSTAGYSSSLIAGYGSTQTAGYESTLTAGYGSTQTAQENSSLTTGYGSTSTAGYSSSLIAGYGSTQTAGYESTLTAGYGSTQTAQERSDLVTGYGSTSTAGYASSLIAGYGSTQTAGYESTLTAGYGSTQTAQENSSLTTGYGSTSTAGFASSLIAGYGSTQTAGYKSTLTAGYGSTQTAEYGSSLTAGYGSTATAGQDSSLIAGYGSSLTSGIRSFLTAGYGSTLIAGLRSVLIAGYGSSLTSGIRSTLTAGYGSNQIASYGSSLIAGHESIQVAGNKSMLIAGKGSSQTAGFRSTLIAGAGSVQLAGDRSRLIAGADSNQTAGDRSKLLAGNNSYLTAGDRSKLTGGHDCTLMAGDQSRLTAGKNSVLTAGARSKLIGSEGSTLSAGEDSTLIFRLWDGKRYRQLVARTGENGVEADIPYYVNEDDDIVDKPDEDDDWIEVK

>InaQ
MNLDKALVLRTCANNMADHCGLIWPASGTVESKYWQSTRRHENGLVGLLWGAGTSAFLSVHADARWIVREVAVADIISLEEPGMVKFPRAEVVHVGDRISASHFISARQADPASTPTPTPTPMTAATPPPTPATANVTLPVAEQASHEVFDVALVSAAAPPVNTLPVTTPQNLQTATYGSTLSGDNHSRLIAGYGSNETAGNHSDLIAGYGSTGTAGSDSSLVAGYGSTQTAGGDSALTAGYGSTQTAREGSNLTAGYGSTGTAGSDSSLIAGYGSTQTSGEDSSLTAGYGSTQTAQEGSNLTAGYGSTGTAGSDSSLIAGYGSTQTSGGDSSLTAGYGSTQTAQEGSNLTAGYGSTGTAGSDSSLIAGYGSTQTSGEDSSLTAGYGSTQTAQEGSNLTAGYGSTGTAGSDSSLIAGYGSTQTSGSDSSLTAGYGSTQTAQEGSNLTAGYGSTGTAGADSSLIAGYGSTQTSGSDSALTAGYGSTQTAQEGSNLTAGYGSTGTAGADSSLIAGYGSTQTSGSESSLTAGYGSTQTAREGSTLTAGYGSTGTAGADSSLIAGYGSTQTSGSESSLTAGYGSTQTAQQGSVLTSGYGSTQTAGAASNLTTGYGSTGTAGHESFIIAGYGSTQTAGHKSILTAGYGSTQTARDGSDLIAGYGSTGTAGSGSSLIAGYGSTQTASYRSMLTAGYGSTQTAREHSDLVTGYGSTSTAGSNSSLIAGYGSTQTAGFKSILTAGYGSTQTAQERSDLVAGYGSTSTAGYSSSLIAGYGSTQTAGYGSTLTTGYGSTQTAQENSSLTTGYGSTSTAGYSSSLIAGYGSTQTAGYESTLTAGYGSTQTAQERGDLVTGYGSTSTAGYASSLIAGYGSTQTAGYESTLTAGYGSTQTAQENSSLTTGYGSTSTAGFASSLIAGYGSTQTAGYKSTLTAGYGSTQTAEYGSSLTAGYGSTATAGQDSSLIAGYGSSLTSGIRSFLTAGYGSTLVAGLRSVLIAGYGSSLTSGIRSTLTAGYGSNQIASYGSSLIAGHESIQVAGNKSMLIAGKGSSQTAGFRSTLIAGAGSVQLAGDRSRLIAGADSNQTAGDRSKLLAGNNSYLTAGDRSKLTGGHDCTLMAGDQSRLTAGKNSILTAGARSKLIGSEGSTLSAGEGSTLIFRLWDGKRYRQLVARTGENGVEADIPYYVNEDDDIVDKPDEDDDWIEVE

>InaV
MNIDKALVLRTCANNMADHCGLIWPASGTVESKYWQSTRRHENGLVGLLWGAGTSAFLSVHADARWKVCEVAVADIIGLEEPGMVKFPRAEVVHVGDRISASHFISARQADPASTPTPTPTPMATPTPAAANIALPVVEQPSHEVFDVALVSAAAPSVNTLPVTTPQNLQTATYGSTLSGDNNSRLIAGYGSNETAGNHSDLIAGYGSTGTAGSDSSLVAGYGSTQTAGGDSALTAGYGSTQTAREGSNLTAGYGSTGTAGSDSSLIAGYGSTQTSGEDSSLTAGYGSTQTAQEGSNLTAGYGSTGTAGSDSSLIAGYGSTQTSGGDSSLTAGYGSTQTAQEGSNLTSGYGSTGTAGADSSLIAGYGSTQTSGSDSALTAGYGSTQTAQEGSNLTAGYGSTGTAGSDSSLIAGYGSTQTSGSDSSLTAGYGSTQTAQEGSNLTAGYGSTGTAGVDSSLIAGYGSTQTSGSDSALTAGYGSTQTAQEGSNLTAGYGSTGTAGADSSLIAGYGSTQTSGSESSLTAGYGSTQTAREGSTLTAGYGSTGTAGADSSLIAGYGSTQTSGSDSSLTAGYGSTQTAQQGSVLTSGYGSTQTAGAASNLTTGYGSTGTAGHESFIIAGYGSTQTAGHKSILTAGYGSTQTARDGSDLVAGYGSTGTAGSGSSLIAGYGSTQTASYKSMLTAGYGSTQTAREHSDLVAGYGSTSTAGSNSSLIAGYGSTQTAGFKSIMTAGYGSTQTAQERSDLVAGYGSTSTAGYSSSLIAGYGSTQTAGYGSTLTTGYGSTQTAQENSSLTTGYGSTSTAGYSSSLIAGYGSTQTAGYESTLTAGYGSTQTAQERSDLVTGYGSTSTAGYASSLIAGYGSTQTAGYESTLTAGYGSTQTAQENSSLTTGYGSTSTAGFASSLIAGYGSTQTAGYKSTLTAGYGSTQTAEYGSSLTAGYGSTATAGQDSSLIAGYGSTLTSGIRSFLTAGYGSTLIAGLRSVLIAGYGSSLTSGIRSTLTAGYGSNQIASYGSSLIAGHESIQVAGNKSMLIAGKGSSQTAGFRSTLIAGAGSVQLAGDRSRLIAGADSNQTAGDRSKLLAGNNSYLTAGDRSKLTGGHDCTLMAGDQSRLTAGKNSILTAGARSKLIGSEGSTLSAGEDSTLIFRLWDGKRYRQLVARTGENGVEADIPYYVNEDDDIVDKPDEDDDWIEVE

-------
#BdIRIs
-------

>Full BdIRI1
MAKCWLPHLLLALLLPAASMAASCHPDDLRALRGFAGNLSGGAVLLRATWSGASCCGWEGVGCDSASGRVTSLWLPGRGLTGPIQGAASLAGLVRLESLNLADNRLVGTIPSWIGELDRLCYLDLSHNASVYEVAKINPSQRSRGVTVSTNRKTLDEEPNTITGTNNHVRSGKDNALSGNDNTVISGDNNVVTGNHNKILSGSHNAVSGHMHVVSGTYHVVTGNNNAVTRSHNTASGNHNIVSGHHNTVSGDHNTVSGSHNTVSGSNHIVTGNNKVVT

>Full BdIRI2
MAKYWLLLQLLSTLLILPAATSTAAACHPDDLRALRGFAGNLSGGAAVLLRAMWSGASCCGWEGVSCDGGASGRVTTLWLPGRGLVGPIQGVSSLAGLAQLESLNLANNRLQIGTTFPSWIGELDRLCYLDLSHNASPLHVKRNRRNTS

>Full BdIRI3
MAKYWLLLQLLSALLILPAATSTAASCHPDDLRALRGFAGNLSGGAAVLLRAAWSGASCCGWEGVRCDDGASGRVTTLWLPGRGLVGPIHGASSLAGLAQLESLNLANNRLHVGTTFPSWIGELDRLCYLDLSHNASPLHVKRNRRTLADGKPNTITGTNNSVKSGNGNTISGNDNVVISGNNNVVSGNHNKVVSGSDNAVSGNMHVVSGTHHVVTGTNNTVSGSNNAVSGSNHIVSGSNKVVTGG

>Full BdIRI4
MAKCWLMQLILLTFLLPAAISTAVACHPDDLRVLRGFAGNLSGAGAVLLRATWSGASCCSWEGVGCNGGASGRVMTLWLPGRGLAGPIQGAASLAGLARLESLNLANNRLQVGTTFPSWIGELDRLRYFDLSHNASSFHVKHGDRRTLADGQPNTITGTNNSVRSGNGNTVSGGDNTVISGNNNVLSGNNNTIISGSDNVVSGTNQVVSGTNHIVTGSNNTVSGNNNNVSGSNHIVSGSNKIVTGG

>Full BdIRI5
MAKCWLLMQLLLALLLPAAISMAAACHPHDLHALQGFAGNLSGGAVLLRATWTGASCCGWEGVGCNGGKSDGRVTTLLLPGRGLTGPILGASSLAGLAQLESLNLAHNRLQVGSTFPLWIGELGHLRYLDLSHNASPLHVNSSNRRTLAEGQPNTISGTNNSVRSGSGNTVMGEDNIVISGDNNVVSGKQNTVTGSDNVVSGSNNSVSGSHNTVSGSNHVVSGDNKVVTGG

>Full BdIRI6
MAKCWLLLQLLSALLLPAAISTAAACHPDDLRALRGFAGNLSGGAVLLRATWSGASCCGWEGVGCDGDAGRVTTLSLPERGLAGPIQGAAPLAGLRQLESLNLAHNRLQVGTTFPSWIAEFDRLCYLDLSHNVSPLHVKSSSRRTLATGQPNTITGANNSVRSGSGNTIMGDGNTITGDNNVVSGNNNTVTGSNNTVSGSNHIVNGDNLVVTGG

>Full BdIRI7
MAKCWLLHLLLALLLPAASTAASCHPDDLHALRGFAGNLSGGAVLLRATWFGASCCGWEGVGCDGASGRVTTLWLPGRGLAGPIQGAASLAGLAQLESLNLANNRLVGTIPSWIGELDRLCYLDLSHNASVDEVHKINPSQRSLGVAVSTNRRTLGGEPNTITGTNNHVRSGKDNALSGSDNTVISGNNNVVTGNHNKVLSGSHNAVSGHMHVVSGTYHVVTGNNNAVTRSHNTASGNHNIVSGHHNTVSGDHNTVSGSHNTVSGSNHIVTGNNKVVT

----------------------------
#Leucine rich repeat domains
----------------------------

>LRR1
SCHPDDLRALRGFAGNLSGGAVLLRATWSGASCCGWEGVGCDSASGRVTSLWLPGRGLTGPIQGAASLAGLVRLESLNLADNRLVGTIPSWIGELDRLCYLDLSHNASVYEVAKINPSQRSRGVTVSTNRKT

>LRR2
CHPDDLRALRGFAGNLSGGAAVLLRAMWSGASCCGWEGVSCDGGASGRVTTLWLPGRGLVGPIQGVSSLAGLAQLESLNLANNRLQIGTTFPSWIGE

>LRR3
TAASCHPDDLRALRGFAGNLSGGAAVLLRAAWSGASCCGWEGVRCDDGASGRVTTLWLPGRGLVGPIHGASSLAGLAQLESLNLANNRLHVGTTFPSWIGELDRLCYLDLSHNASPLHVKRNRRTL

>LRR4
TAVACHPDDLRVLRGFAGNLSGAGAVLLRATWSGASCCSWEGVGCNGGASGRVMTLWLPGRGLAGPIQGAASLAGLARLESLNLANNRLQVGTTFPSWIGELDRLRYFDLSHNASSFHVKHGDRRTL

>LRR5
CHPHDLHALQGFAGNLSGGAVLLRATWTGASCCGWEGVGCNGGKSDGRVTTLLLPGRGLTGPILGASSLAGLAQLESLNLAHNRLQVGSTFPLWIGELGHLRYLDLSHNASPLHVNSSNRRTL

>LRR6
TAAACHPDDLRALRGFAGNLSGGAVLLRATWSGASCCGWEGVGCDGDAGRVTTLSLPERGLAGPIQGAAPLAGLRQLESLNLAHNRLQVGTTFPSWIAEFDRLCYLDLSHNVSPLHVKSSSRRTL

>LRR7
SCHPDDLHALRGFAGNLSGGAVLLRATWFGASCCGWEGVGCDGASGRVTTLWLPGRGLAGPIQGAASLAGLAQLESLNLANNRLVGTIPSWIGELDRLCYLDLSHNASVDEVHKINPSQRSLGVAVSTNRRT

---------------------------
#Antifreeze protein domains
---------------------------

>AFP1
LDEEPNTITGTNNHVRSGKDNALSGNDNTVISGDNNVVTGNHNKILSGSHNAVSGHMHVVSGTYHVVTGNNNAVTRSHNTASGNHNIVSGHHNTVSGDHNTVSGSHNTVSGSNHIVTGNNKVVT

>AFP2
LDRLCYLDLSHNASPLHVKRNRRNTS

>AFP3
ADGKPNTITGTNNSVKSGNGNTISGNDNVVISGNNNVVSGNHNKVVSGSDNAVSGNMHVVSGTHHVVTGTNNTVSGSNNAVSGSNHIVSGSNKVVTGG

>AFP4
ADGQPNTITGTNNSVRSGNGNTVSGGDNTVISGNNNVLSGNNNTIISGSDNVVSGTNQVVSGTNHIVTGSNNTVSGNNNNVSGSNHIVSGSNKIVTGG

>AFP5
AEGQPNTISGTNNSVRSGSGNTVMGEDNIVISGDNNVVSGKQNTVTGSDNVVSGSNNSVSGSHNTVSGSNHVVSGDNKVVTGG

>AFP6
ATGQPNTITGANNSVRSGSGNTIMGDGNTITGDNNVVSGNNNTVTGSNNTVSGSNHIVNGDNLVVTGG

>AFP7
LGGEPNTITGTNNHVRSGKDNALSGSDNTVISGNNNVVTGNHNKVLSGSHNAVSGHMHVVSGTYHVVTGNNNAVTRSHNTASGNHNIVSGHHNTVSGDHNTVSGSHNTVSGSNHIVTGNNKVVT

---------------
#flg22 peptides
---------------
>Gamma
ERLSSGLRINSAKDDAAGLQIS

>Alpha
NRISTGKRVNSASDNAAYWSIA

-------------------
#Gamma permutations
-------------------
>GammaP1
AISWYAANDSASNVRKGTSIRN

>GammaP2
LGRDQILDSAGEASLRKSSNAI

>GammaP3
EQDKALLRIGSSGAANIDRLSS

>GammaP4
SRQDRILNSAKLGIDLSSAAEG

>GammaP5
REASLANSSIDRGAIKQLSDLG

-----------
#Other LRRs
-----------

>BdRLP23
QRLGDVDPDLPALLKIKAQFGEQAALASWQPGTDHCTWPHAFCDQNRRVVAIFLEGVNITSTIPPAIGDLDRLRTISIDNIPGLTGPIPDSFGNLSRLSIFNIMRTSVSGPLPASLARTNLTSVSFAQNKLTGRIPMSFQDLPHLAHFDASNNALVGRIPPGLVSGGTRESPLGLTLSNNRLTGRIPRSYGREDYFINFRVANNRLRGDASFLFRREKAVSDIDLSGNKLRFDLIGVEIPEALLFLNVSRNRIYGGVPASLPRSRLVRLDLSYNRLCGEIPPGGIMGRFKAAAYEHNRCLCGTPLPPC

>BdPEPR1
LNHEGWLLLALKSQMIDSSHHLDNWKPRDPSPCMWTGVICSSAPMPAVVSLNLSNMELSGTVGQSIGGLAELTDLDLSFNEFFGTIPTGIGNCSKLVWLALNNNNFEGTIPPELGKLAMLTTCNLCNNKLYGSIPDEIGNMASLVDLVGYSNNISGSIPHSIGKLKNLQSIRLGQNLISGNIPVEIGECHNLVVFGLAQNKLQGPLPKEIGNLSLMTDLILWGNQLSGAIPPEIGNCTNLRTIALYDNGLVGPIPPTIGNIKYLQRLYLYRNSLNGTIPPEIGNLLLAGEIDFSENFLMGGIPKELGNIPGLYLLYLFQNQLTGFIPKELCGLKNLTKLDLSINSLTGPIPAGFQYMPKLIQLQLFNNRLSGDIPPRFGIYSRLWVVDFSNNNITGQIPRDLCRQSNLILLNLMSNKLSGNIPHRITSCRSLVQLRLSDNSLTGSFPTDLCNLVNLTTIELARNKFNGPIPPQIGNCMALQRLDLTNNYFTSELPREIGNLSKLVVFNISSNRLGGSIPLEIFNCTMLQRLDLSQNSLEGSLPTEVGRLPQLELLSFADNRLSGQVPPILGKLSHLTALQIGGNQFSGGIPKELGLLSSLQIAMNLSYNNLSGNIPSELGSLALLENLFLNNNKLTGAIPDTFANLSSLLELNVSYNNLTGALPPVPLFDNMVVTSFIGNRGLCGG

>AtFLS2
QSFEPEIEALKSFKNGISNDPLGVLSDWTIIGSLRHCNWTGITCDSTGHVVSVSLLEKQLEGVLSPAIANLTYLQVLDLTSNSFTGKIPAEIGKLTELNQLILYLNYFSGSIPSGIWELKNIFYLDLRNNLLSGDVPEEICKTSSLVLIGFDYNNLTGKIPECLGDLVHLQMFVAAGNHLTGSIPVSIGTLANLTDLDLSGNQLTGKIPRDFGNLLNLQSLVLTENLLEGDIPAEIGNCSSLVQLELYDNQLTGKIPAELGNLVQLQALRIYKNKLTSSIPSSLFRLTQLTHLGLSENHLVGPISEEIGFLESLEVLTLHSNNFTGEFPQSITNLRNLTVLTVGFNNISGELPADLGLLTNLRNLSAHDNLLTGPIPSSISNCTGLKLLDLSHNQMTGEIPRGFGRMNLTFISIGRNHFTGEIPDDIFNCSNLETLSVADNNLTGTLKPLIGKLQKLRILQVSYNSLTGPIPREIGNLKDLNILYLHSNGFTGRIPREMSNLTLLQGLRMYSNDLEGPIPEEMFDMKLLSVLDLSNNKFSGQIPALFSKLESLTYLSLQGNKFNGSIPASLKSLSLLNTFDISDNLLTGTIPGELLASLKNMQLYLNFSNNLLTGTIPKELGKLEMVQEIDLSNNLFSGSIPRSLQACKNVFTLDFSQNNLSGHIPDEVFQGMDMIISLNLSRNSFSGEIPQSFGNMTHLVSLDLSSNNLTGEIPESLANLSTLKHLKLASNNLKGHVPESGVFKNINASDLMGNTDLCGSKKPLKPCTIKQKSS

>BdFLS2
ASASVQLEALLEFKKGVTADPLGALSGWQKKADSRNAIAAAAIVPPPHCNWTGIACNIAGQVTSIQLLESQLEGTLTPFLGNITTLQVLDLTSNAFFGLIPPELGRLQSLEGLILTVNTFTGVIPTSLGALTSLQILDLSNNSLHGTIPSQLCNCSAMWALGLEANNLTGQIPPCIGDLSNLEIFQAYINSLSGELPRSFANLTKLTTLDLSGNQLSGRVPPAIGTFSGLKILQLFENRFSGKIPPELGNCKNLTLLNIYSNRFTGAIPRELGGLTNLKALRVYDNALSSTIPSSLRRCSSLLALGLSMNELTGNIPPELGELRSLQSLTLHENRLTGTVPKSLTRLVNLMRLSFSDNSLSGPLPEAIGSLRNLQVLIIHGNSLSGPIPASIVNCTSLSNASMAFNGFSGSLPAGLGRLQSLVFLSLGDNSLEGTIPEDLFDCVRLRTLNLAENNLTGRLSPRVGKLGGELRLLQLQGNALSGSIPDEIGNLTRLIGLTLGRNKFSGRVPGSISNLSSSLQVLDLLQNRLSGALPEELFELTSLTVLTLASNRFTGPIPNAVSKLRALSLLDLSHNMLNGTVPAGLSGGHEQLLKLDLSHNRLSGAIPGAAMSGATGLQMYLNLSHNAFTGTIPREIGGLAMVQAIDLSNNELSGGVPATLAGCKNLYTLDISSNSLTGELPAGLFPQLDLLTTLNVSGNDFHGEILPGLAGMKHLQTVDVSRNAFEGRVPPGMEKMTSLRELNLSWNRFEGPVPDRGVFADIGMSSLQGNAGLCGWKKLLAPCHAAAGNQ
